# Supplementary material
Source: publisher figshare collection journal article supplement (https://asha.figshare.com/articles/dataset/_/5116831)
Supplement: Supplementary file 1 [file 1]

#### Supplemental Material S4. Criteria used to determine severity descriptors.

| Measure                             | Severe | Moderate-Severe | Moderate | Mild-Moderate | Mild |
|-------------------------------------|--------|-----------------|----------|---------------|------|
| Monosyllabic words                  | <25%   | 25%–70%         | >70%     | >70%          | >90% |
| Bisyllabic words                    | <10%   | <25%            | 25%–50%  | >50%          | >50% |
| Trisyllabic words                   | <10%   | <10%            | <25%     | 25%–50%       | >50% |
| 4 syllable words                    | <10%   | <10%            | <10%     | 10%–50%       | >50% |
| ASSIDS (Yorkston & Beukelman, 1981) | <25%   | 25%–49%         | 50%–75%  | >75%          | >75% |

The following three measures were utilized as the primary criteria for decision making:

- 1) Monosyllabic word production: accurate articulation of the entire word
- 2) Bisyllabic word production: accurate articulation of the entire word
- 3) ASSIDS: single word intelligibility as scored through orthographic transcription

If all three of the criteria did not fall into the same category, then the category that matched two of the three criteria was selected.

If category assignment was ambiguous, clinical judgment was used to select the category.

Trisyllabic word and four syllable word accuracy was available to assist with clinical judgments.

#### Reference

Yorkston, K. M., & Beukelman, D. R. (1981). *Assessment of Intelligibility of Dysarthric Speech*. Austin, TX: Pro-Ed.
