# Supplementary material
Source: publisher figshare collection journal article supplement (https://asha.figshare.com/articles/dataset/_/5116831)
Supplement: Supplementary file 2 [file 1]

### Supplemental Material S3. Probe and treatment stimuli for all participants.

#### Participant 1

##### Set 1 (Blocked)

|           | <u>Subset A (/pr/)</u> | <u>Subset B (/ks/)</u> |
|-----------|------------------------|------------------------|
| Treated   | Practical              | Extinction             |
|           | Privately              | Excellent              |
|           | Precocious             | Flexible               |
|           | Prohibit               | Hexagon                |
|           | Prejudice              | Luxury                 |
|           | President              | Excursion              |
|           | Presumption            | Successful             |
|           | Pretentious            | Vexation               |
|           | Principle              | Oxygen                 |
|           | Probable               | Excited                |
| Untreated | Precision              | Fixation               |
|           | Productive             | Succession             |
|           | Primitive              | Expulsion              |
|           | Presently              | Taxation               |
|           | Pragmatic              | Vaccinate              |

##### Set 2 (Random)

|         | <u>Subset A (/gl/)</u> | <u>Subset B (/nd/)</u> |
|---------|------------------------|------------------------|
| Treated | Glaucoma               | Condition              |
|         | Glamorous              | Endurance              |

|                      |                       |                        |
|----------------------|-----------------------|------------------------|
|                      | Gleefully             | Inundate               |
|                      | Glimmering            | Laundromat             |
|                      | Globalize             | Mandarin               |
|                      | Glorify               | Plundering             |
|                      | Glossary              | Tendency               |
|                      | Gluteal               | Thunderbolt            |
|                      | Gluttony              | Underbrush             |
|                      | Glaringly             | Wonderful              |
| Untreated            | Glandular             | Undermine              |
|                      | Gloomier              | Conductor              |
|                      | Glycerin              | Meander                |
|                      | Glutamate             | Appendage              |
|                      | Glistening            | Sundial                |
| <u>Participant 2</u> |                       |                        |
|                      | Set 1 (Blocked)       |                        |
|                      | <u>Subset A (/f/)</u> | <u>Subset B (/sm/)</u> |
|                      | Beef                  | Smack                  |
|                      | Muff                  | Smile                  |
|                      | Leaf                  | Smash                  |
|                      | Knife                 | Smoke                  |
|                      | Roof                  | Smooth                 |
|                      | Turf                  | Smudge                 |
| Treated              | Jeff                  | Smock                  |

|           |       |        |
|-----------|-------|--------|
| Untreated | Laugh | Smirk  |
|           | Cough | Smidge |
|           | Woof  | Smote  |
|           | Buff  | Smart  |
|           | Rough | Smell  |
|           | Loaf  | Small  |
|           | Tough | Smut   |
|           | Chef  | Smith  |
|           |       |        |
|           |       |        |

Set 2 (Random)

|           | <u>Subset A (/p/)</u> | <u>Subset B (/b/)</u> |
|-----------|-----------------------|-----------------------|
| Treated   | Lip                   | Black                 |
|           | Rap                   | Blot                  |
|           | Top                   | Blip                  |
|           | Shape                 | Blurt                 |
|           | Chop                  | Blog                  |
|           | Nape                  | Blade                 |
|           | Sap                   | Blab                  |
|           | Cheap                 | Blush                 |
|           | Carp                  | Bloom                 |
|           | Gyp                   | Bleak                 |
| Untreated | Lap                   | Bling                 |
|           | Ripe                  | Blotch                |

|       |       |
|-------|-------|
| Dope  | Bleed |
| Mop   | Blurb |
| Sharp | Blame |

### Participant 3

#### Set 1 (Blocked)

|         | <u>Subset A (/gl/)</u> | <u>Subset B (/kw/)</u> |
|---------|------------------------|------------------------|
| Treated | Glacier                | Awkward                |
|         | Gluten                 | Banquet                |
|         | Glory                  | Vanquish               |
|         | Global                 | Tranquil               |
|         | Glaring                | Sequin                 |
|         | Glamour                | Liquid                 |
|         | Gleeful                | Misquote               |
|         | Glover                 | Equal                  |
|         | Glucose                | Request                |
|         | Glossy                 | Equip                  |

|           |         |           |
|-----------|---------|-----------|
| Untreated | Glimmer | Acquaint  |
|           | Gladden | Turquoise |
|           | Gloomy  | Frequent  |
|           | Glycol  | Kumquat   |
|           | Glider  | Inquest   |

#### Set 2 (Random)

|                      | <u>Subset A (/θr/)</u> | <u>Subset B (/st/)</u> |
|----------------------|------------------------|------------------------|
| Treated              | Threading              | Instead                |
|                      | Thriller               | Estate                 |
|                      | Thriving               | Abstain                |
|                      | Threshold              | Einstein               |
|                      | Thrushes               | Asters                 |
|                      | Throwing               | Youngster              |
|                      | Thrasher               | Instinct               |
|                      | Throaty                | Astute                 |
|                      | Throttle               | Instance               |
|                      | Thrumming              | Instill                |
| Untreated            | Thrifty                | Install                |
|                      | Thrombus               | Esteem                 |
|                      | Threaten               | Astound                |
|                      | Throstle               | Eastern                |
|                      | Throbbing              | Austere                |
| <u>Participant 4</u> |                        |                        |
|                      | Set 1 (Blocked)        |                        |
|                      | <u>Subset A (/θr/)</u> | <u>Subset B (/gl/)</u> |
| Treated              | Threading              | Glamorous              |
|                      | Throughout             | Gleefully              |
|                      | Threaten               | Glistening             |
|                      | Threshold              | Glaucoma               |

|                |                        |                        |
|----------------|------------------------|------------------------|
| Untreated      | Threefold              | Gloria                 |
|                | Thrifty                | Glittering             |
|                | Thresher               | Glossary               |
|                | Throaty                | Glycerin               |
|                | Thrushes               | Gluttony               |
|                | Throwback              | Glycolic               |
|                | Thrombin               | Glorify                |
|                | Throwing               | Gloomier               |
|                | Thriving               | Glorious               |
|                | Thriller               | Glimmering             |
|                | Throbbing              | Glandular              |
| Set 2 (Random) |                        |                        |
| Treated        | <u>Subset A (/kw/)</u> | <u>Subset B (/sn/)</u> |
|                | Quadratic              | Snapdragon             |
|                | Quackery               | Snickering             |
|                | Quietly                | Snazziest              |
|                | Quantify               | Sneakily               |
|                | Querulous              | Snobbishly             |
|                | Quadriiceps            | Snorkeling             |
|                | Quarreling             | Snuggling              |
|                | Quagmire               | Sneeziest              |
|                | Quotation              | Snarkiest              |
|                | Quizzical              | Sneerfully             |

|           |            |            |
|-----------|------------|------------|
| Untreated | Qualify    | Snappiest  |
|           | Queasiness | Sniffiness |
|           | Quadruple  | Snoopiest  |
|           | Quintuple  | Snowmobile |
|           | Quavering  | Snivelling |

### Participant 5

All consonants correct required for a correct score for this participant.

#### Set 1 (Blocked)

|           |                       |                        |
|-----------|-----------------------|------------------------|
|           | <u>Subset A (/θ/)</u> | <u>Subset B (/s*/)</u> |
| Treated   | Cathartic             | Statistical            |
|           | Arithmetic            | Scholastic             |
|           | Arthritic             | Scoliosis              |
|           | Diphtheria            | Stephanotis            |
|           | Authenticate          | Scarcity               |
| Untreated | Apathetic             | Stoicism               |
|           | Ethereal              | Statuesque             |
|           | Catheter              | Stochastic             |

#### Set 2 (Random)

|         |                        |                       |
|---------|------------------------|-----------------------|
|         | <u>Subset A (/br/)</u> | <u>Subset B (/l/)</u> |
| Treated | Algebraic              | Oleander              |

|           |             |           |
|-----------|-------------|-----------|
|           | Abbreviate  | Illusion  |
|           | Inebriate   | Alkaline  |
|           | Bracketed   | Aluminum  |
|           | Embryonic   | Olympic   |
| Untreated | Abrasion    | Alienate  |
|           | Brandishing | Alleviate |
|           | Ambrosia    | Uvula     |

### Participant 6

All consonants correct required for a correct score for this participant.

#### Set 1 (Blocked)

|           |                        |                        |
|-----------|------------------------|------------------------|
|           | <u>Subset A (/st/)</u> | <u>Subset B (/dʒ/)</u> |
| Treated   | Statuesque             | Budgetary              |
|           | Stationary             | Enjoyment              |
|           | Stigmatize             | Adjustable             |
|           | Stoicism               | Objective              |
|           | Stupendous             | Impinging              |
| Untreated | Staccato               | Adjective              |
|           | Stephanotis            | Rejuvenate             |
|           | Statistical            | Perjury                |

#### Set 2 (Random)



|           | <u>Subset A (/gl/)</u> | <u>Subset B (/θ/)</u> |
|-----------|------------------------|-----------------------|
| Treated   | Glaringly              | Atheist               |
|           | Glaucoma               | Authenticate          |
|           | Gloriously             | Cathartic             |
|           | Glucosamine            | Orthodontia           |
|           | Gluttonous             | Pathology             |
| Untreated | Glaciate               | Diphtheria            |
|           | Gloomily               | Mythical              |
|           | Glycolysis             | Arithmetic            |

Participant 7

|         | Set 1 (Blocked)        |                       |
|---------|------------------------|-----------------------|
|         | <u>Subset A (/dʒ/)</u> | <u>Subset B (/z/)</u> |
| Treated | Gem                    | Zag                   |
|         | Jail                   | Zoot                  |
|         | Jet                    | Zed                   |
|         | Jane                   | Zees                  |
|         | Juice                  | Zone                  |
|         | June                   | Zip                   |
|         | Jade                   | Zoom                  |
|         | Jot                    | Zit                   |
|         | Germ                   | Zonk                  |
|         | Gyp                    | Zen                   |

|           |      |      |
|-----------|------|------|
| Untreated | John | Zing |
|           | Gym  | Zig  |
|           | Job  | Zap  |
|           | Join | Zane |
|           | Jill | Zoos |

Set 2 (Random)

|         |                       |                       |
|---------|-----------------------|-----------------------|
|         | <u>Subset A (/g/)</u> | <u>Subset B (/r/)</u> |
| Treated | Gab                   | Race                  |
|         | Gash                  | Rack                  |
|         | Game                  | Reef                  |
|         | Gum                   | Red                   |
|         | Get                   | Rib                   |
|         | Goat                  | Rice                  |
|         | Gag                   | Roam                  |
|         | Gown                  | Route                 |
|         | Gut                   | Rude                  |
|         | Goose                 | Rug                   |

|           |      |      |
|-----------|------|------|
| Untreated | Goof | Rate |
|           | Gain | Ram  |
|           | Gout | Rim  |
|           | Gush | Road |
|           | Gone | Rum  |

## Participant 8

### Set 1 (Blocked)

|           | <u>Subset A (/g/)</u> | <u>Subset B (/θ/)</u> |
|-----------|-----------------------|-----------------------|
| Treated   | Backlog               | Beneath               |
|           | Bulldog               | Birdbath              |
|           | Earwig                | Bismuth               |
|           | Eclogue               | Forsooth              |
|           | Fatigue               | Herewith              |
|           | Zigzag                | Mammoth               |
|           | Homburg               | Rebirth               |
|           | Humbug                | Uncouth               |
|           | Prologue              | Warpath               |
|           | Renegé                | Zenith                |
| Untreated | Colleague             | Eyetooth              |
|           | Iceberg               | Sabbath               |
|           | Intrigue              | Tollbooth             |
|           | Sandbag               | Unearth               |
|           | Hedgehog              | Vermouth              |

### Set 2 (Random)

|         | <u>Subset A (/b/)</u> | <u>Subset B (/f/)</u> |
|---------|-----------------------|-----------------------|
| Treated | Absorb                | Banish                |
|         | Adverb                | Furnish               |
|         | Cherub                | Mustache              |

|                      |                       |                        |
|----------------------|-----------------------|------------------------|
|                      | Confab                | Panache                |
|                      | Disturb               | Relish                 |
|                      | Imbibe                | Selfish                |
|                      | Microbe               | Sheepish               |
|                      | Perturb               | Varnish                |
|                      | Transcribe            | Yiddish                |
|                      | Wardrobe              | Youngish               |
| Untreated            | Describe              | Foolish                |
|                      | Disrobe               | Garish                 |
|                      | Proverb               | Garnish                |
|                      | Rhubarb               | Goulash                |
|                      | Superb                | Rubbish                |
| <u>Participant 9</u> |                       |                        |
| Set 1 (Blocked)      |                       |                        |
| Treated              | <u>Subset A (/θ/)</u> | <u>Subset B (/gl/)</u> |
|                      | Thieve                | Gleam                  |
|                      | Thatch                | Glam                   |
|                      | Thane                 | Glib                   |
|                      | Thong                 | Globe                  |
|                      | Therm                 | Gloom                  |
|                      | Theme                 | Glove                  |
|                      | Thought               | Glum                   |
|                      | Thighs                | Glass                  |

|           |                       |                        |
|-----------|-----------------------|------------------------|
| Untreated | Thick                 | Glut                   |
|           | Thumb                 | Glop                   |
|           | Thin                  | Gloat                  |
|           | Thing                 | Glen                   |
|           | Thaws                 | Glob                   |
|           | Thorn                 | Glitch                 |
| Treated   | Thebes                | Gloss                  |
|           | Set 2 (Random)        |                        |
|           | <u>Subset A (/f/)</u> | <u>Subset B (/br/)</u> |
|           | Chic                  | Brace                  |
|           | Shade                 | Brag                   |
|           | Shed                  | Braid                  |
|           | Sheep                 | Breed                  |
|           | Sheer                 | Bribe                  |
|           | Shire                 | Brick                  |
|           | Shirt                 | Bring                  |
| Untreated | Shoot                 | Broil                  |
|           | Shout                 | Brought                |
|           | Shuck                 | Brown                  |
|           | Chef                  | Brew                   |
|           | Shake                 | Brim                   |
|           | Shame                 | Broke                  |

|       |       |
|-------|-------|
| Shine | Brood |
| Shock | Brute |

## Participant 10

### Set 1 (Blocked)

|         | <u>Subset A (/s/)</u> | <u>Subset B (/bl/)</u> |
|---------|-----------------------|------------------------|
| Treated | Sacrilegious          | Blamelessness          |
|         | Sagaciousness         | Blandishing            |
|         | Satiation             | Blastoma               |
|         | Sensational           | Blatantly              |
|         | Substantially         | Blathering             |
|         | Superstitious         | Blistering             |
|         | Sustainable           | Blotchiest             |
|         | Sustenance            | Blubbering             |
|         | Synchronizing         | Bluffable              |
|         | Systematize           | Blunderbuss            |

|           |              |             |
|-----------|--------------|-------------|
| Untreated | Circuitous   | Blasphemous |
|           | Sadistically | Blithely    |
|           | Sagacity     | Bludgeoning |
|           | Secessionist | Blurriest   |
|           | Subservience | Blustering  |

### Set 2 (Random)

| <u>Subset A (/f/)</u> | <u>Subset B (/str/)</u> |
|-----------------------|-------------------------|
|-----------------------|-------------------------|

|         |                |               |
|---------|----------------|---------------|
| Treated | Fiberoptic     | Strangulation |
|         | Phantasm       | Strategically |
|         | Pharmacist     | Stratosphere  |
|         | Phenomenon     | Strenuously   |
|         | Phenotypic     | Streptococcus |
|         | Pheromone      | Striations    |
|         | Philander      | Structural    |
|         | Philanthropist | Stroboscopy   |
|         | Philharmonic   | Stroganoff    |
|         | Philistine     | Strontium     |

|           |                 |             |
|-----------|-----------------|-------------|
| Untreated | Filipinos       | Stressfully |
|           | Philosophize    | Stretchiest |
|           | Phonemically    | Stridently  |
|           | Phosphorescence | Stringently |
|           | Photosphere     | Struggling  |

### Participant 11

#### Set 1 (Random)

|         |                        |                        |
|---------|------------------------|------------------------|
|         | <u>Subset A (/fl/)</u> | <u>Subset B (/dʒ/)</u> |
| Treated | Will flabbergast       | One injection          |
|         | How flattering         | More disjointed        |
|         | My flakiness           | Are maladjusted        |
|         | Is flirtatious         | Bad perjury            |
|         | Be flexible            | So injudicious         |

|           |                  |                  |
|-----------|------------------|------------------|
|           | Such flamboyance | Does rejuvenate  |
|           | Hot fluorescent  | Long conjugation |
|           | Good flavoring   | The sojourner    |
|           | Big flamingo     | In conjunction   |
|           | That flotation   | His pejorative   |
| Untreated | Can fluctuate    | Not adjustable   |
|           | Talk fluently    | Can adjudicate   |
|           | Was flammable    | Good banjoist    |
|           | Not floundering  | Will interject   |
|           | So flagrantly    | Is projecting    |

Set 2 (Blocked)

|         |                        |                       |
|---------|------------------------|-----------------------|
| Treated | <u>Subset A (/sn/)</u> | <u>Subset B (/θ/)</u> |
|         | The snazziest          | Good hypothesis       |
|         | Her snootiness         | Is lethargic          |
|         | Nice snuggling         | Are enthusing         |
|         | How snobbishly         | Long anthology        |
|         | More snickering        | Some bioethics        |
|         | My snappiest           | Such antipathy        |
|         | Fun snorkeling         | How methodic          |
|         | No sniveling           | So cathartic          |
|         | Walk sneakily          | Big cathedral         |
|         | Much snowier           | In arithmetic         |



|           |                 |                |
|-----------|-----------------|----------------|
| Untreated | Look sneerfully | Not apathetic  |
|           | The sneeziest   | Can euthanize  |
|           | Her sniffiness  | The pantheon   |
|           | Not snarkiest   | Was monolithic |
|           | Be snoopiast    | His atheism    |

## Participant 12

### Set 1 (Random)

|           | <u>Subset A (/fr/)</u> | <u>Subset B (/θ/)</u> |
|-----------|------------------------|-----------------------|
| Treated   | Frail                  | Thank                 |
|           | Frat                   | Thatch                |
|           | Fraud                  | Thaws                 |
|           | Free                   | Theme                 |
|           | Fresh                  | Thick                 |
|           | Fried                  | Thighs                |
|           | Fright                 | Thin                  |
|           | Frill                  | Thing                 |
|           | From                   | Third                 |
|           | Fruit                  | Thorn                 |
| Untreated | Frame                  | Thad                  |
|           | Freed                  | Thieve                |
|           | Fret                   | Thong                 |
|           | Frog                   | Thor                  |
|           | Frosh                  | Thumb                 |

Set 2 (Blocked)

|           | <u>Subset A (/k/)</u> | <u>Subset B (/sm/)</u> |
|-----------|-----------------------|------------------------|
| Treated   | Can                   | S’mores                |
|           | Cap                   | Small                  |
|           | Car                   | Smash                  |
|           | Coal                  | Smear                  |
|           | Comb                  | Smell                  |
|           | Cows                  | Smidge                 |
|           | Cup                   | Smirk                  |
|           | Kale                  | Smite                  |
|           | Key                   | Smooth                 |
|           | Kid                   | Smudge                 |
| Untreated | Came                  | Smile                  |
|           | Cook                  | Smog                   |
|           | Cub                   | Smooch                 |
|           | Keep                  | Smote                  |
|           | Kill                  | Smug                   |

Participant 13

Set 1 (Random)

|         | <u>Subset A (/z/)</u> | <u>Subset B (/st/)</u> |
|---------|-----------------------|------------------------|
| Treated | Buzz                  | Stab                   |
|         | Faze                  | Stuck                  |

|           |                       |                        |
|-----------|-----------------------|------------------------|
| Untreated | Wise                  | Stem                   |
|           | Rose                  | Sting                  |
|           | News                  | Stale                  |
|           | Shoes                 | Stitch                 |
|           | Toys                  | Start                  |
|           | Tours                 | Stern                  |
|           | Vase                  | Stove                  |
|           | Cheese                | Still                  |
|           | Bees                  | Step                   |
|           | Nose                  | Stub                   |
|           | Choose                | Starve                 |
|           | Keys                  | Steak                  |
|           | Thighs                | Stool                  |
|           | Set 2 (Blocked)       |                        |
| Treated   | <u>Subset A (/f/)</u> | <u>Subset B (/gl/)</u> |
|           | Leaf                  | Glib                   |
|           | Knife                 | Glass                  |
|           | Laugh                 | Gleam                  |
|           | Muff                  | Globe                  |
|           | Sheaf                 | Glen                   |
|           | Buff                  | Glitch                 |
|           | Turf                  | Glop                   |
|           | Poof                  | Glove                  |

|           |       |       |
|-----------|-------|-------|
|           | Tiff  | Gloom |
|           | Roof  | Glut  |
| Untreated | Loaf  | Glob  |
|           | Beef  | Glum  |
|           | Tough | Gloat |
|           | Rough | Gloss |
|           | Life  | Glam  |

#### Participant 14

|           |                        |                        |
|-----------|------------------------|------------------------|
|           | Set 1 (Random)         |                        |
|           | <u>Subset A (/sn/)</u> | <u>Subset B (/θr/)</u> |
| Treated   | Fun snacking           | Was threading          |
|           | Be snoopy              | Low throaty            |
|           | The snafu              | Are thriving           |
|           | Talk snidely           | Do threaten            |
|           | Will snuggle           | Head throbbing         |
|           | That snippet           | All throughout         |
|           | My sneaker             | Good throwing          |
|           | Can snorkel            | New thriller           |
|           | Look snazzy            | High thrombin          |
|           | Her sneezing           | So thrifty             |
| Untreated | How snappy             | Two thrushes           |
|           | Mean snicker           | Wide threshold         |

|              |               |
|--------------|---------------|
| No snoozing  | Saw threefold |
| Not snobbish | His throwback |
| Loud snoring | Big thresher  |

Set 2 (Blocked)

|           | <u>Subset A (/fl/)</u> | <u>Subset B (/kw/)</u> |
|-----------|------------------------|------------------------|
| Treated   | Is flabby              | Fine cuisine           |
|           | Not flaccid            | Big quota              |
|           | Eyes flutter           | One quarter            |
|           | Hot flaming            | Be queenly             |
|           | New flannel            | Fun quilting           |
|           | Red flashing           | Full quorum            |
|           | Will flounder          | High quotient          |
|           | Nice flavor            | Good quencher          |
|           | Does flicker           | John Quincy            |
|           | Has fluoride           | Feel queasy            |
| Untreated | Real flimsy            | Are Quaker             |
|           | The fledgling          | Male quartet           |
|           | Wet flipper            | In quicksand           |
|           | So flaky               | Bow quiver             |
|           | Some flurries          | Tough question         |

Participant 15

All consonants correct required for

a correct score for this participant.

Set 1 (Random)

|           | <u>Subset A (/st/)</u> | <u>Subset B (/tr/)</u> |
|-----------|------------------------|------------------------|
| Treated   | Stoicism               | Matriculate            |
|           | Statistical            | Indoctrination         |
|           | Stephanotis            | Gentrification         |
|           | Statuesquely           | Intriguingly           |
|           | Studiously             | Nutritional            |
| Untreated | Sensitivity            | Contributor            |
|           | Stereoscopic           | Diametrically          |
|           | Stochastically         | Electrified            |

Set 2 (Blocked)

|           | <u>Subset A (/θ/)</u> | <u>Subset B (/fl/)</u> |
|-----------|-----------------------|------------------------|
| Treated   | Authenticate          | Flabbergasted          |
|           | Enthusiastic          | Flirtatiously          |
|           | Epithelium            | Mellifluent            |
|           | Hypothetical          | Effluvium              |
|           | Ichthyology           | Inflammatory           |
| Untreated | Methuselah            | Influentially          |
|           | Orthodontia           | Affluently             |
|           | Ophthalmology         | Conflagration          |

## Participant 16

All consonants correct required for a correct score for this participant.

### Set 1 (Random)

|           | <u>Subset A (/br/)</u> | <u>Subset B (/kw/)</u> |
|-----------|------------------------|------------------------|
| Treated   | Candelabra             | Acquaintances          |
|           | Defibrillate           | Consequential          |
|           | Embraceable            | Delinquency            |
|           | Fabrication            | Equality               |
|           | Sauerbraten            | Liquidation            |
| Untreated | Algebraic              | Acquiescence           |
|           | Embryonic              | Eloquently             |
|           | Lubrication            | Ventriloquist          |

### Set 2 (Blocked)

|           | <u>Subset A (/fl/)</u> | <u>Subset B (/sp/)</u> |
|-----------|------------------------|------------------------|
| Treated   | Affluently             | Conspicuous            |
|           | Camouflaging           | Correspondence         |
|           | Deflecting             | Introspection          |
|           | Influenza              | Prospectively          |
|           | Retroflexion           | Responsiveness         |
| Untreated | Conflictingly          | Despondency            |
|           | Influential            | Perspicacious          |

|                       | Riboflavin             | Unspecified            |
|-----------------------|------------------------|------------------------|
| <u>Participant 17</u> |                        |                        |
|                       | Set 1 (Random)         |                        |
|                       | <u>Subset A (/dʒ/)</u> | <u>Subset B (/gl/)</u> |
| Treated               | Gem                    | Glib                   |
|                       | Jail                   | Glass                  |
|                       | Jet                    | Gleam                  |
|                       | Jane                   | Globe                  |
|                       | Jewel                  | Glen                   |
|                       | June                   | Glitch                 |
|                       | Join                   | Glop                   |
|                       | Jot                    | Glove                  |
|                       | Germ                   | Gloom                  |
|                       | Gyp                    | Glut                   |
| Untreated             | John                   | Glob                   |
|                       | Gym                    | Glum                   |
|                       | Job                    | Gloat                  |
|                       | Jade                   | Gloss                  |
|                       | Jill                   | Glam                   |
|                       | Set 2 (Blocked)        |                        |
|                       | <u>Subset A (/n/)</u>  | <u>Subset B (/st/)</u> |
| Treated               | Knack                  | Stab                   |



|                       |                       |                        |
|-----------------------|-----------------------|------------------------|
|                       | Night                 | Stuck                  |
|                       | Niece                 | Stem                   |
|                       | Notch                 | Sting                  |
|                       | Neck                  | Stale                  |
|                       | Next                  | Stitch                 |
|                       | Noise                 | Start                  |
|                       | North                 | Stern                  |
|                       | Need                  | Stove                  |
|                       | Nerve                 | Still                  |
|                       |                       |                        |
| Untreated             | Not                   | Step                   |
|                       | Nurse                 | Stub                   |
|                       | Nine                  | Starve                 |
|                       | Knit                  | Steak                  |
|                       | News                  | Stool                  |
|                       |                       |                        |
| <u>Participant 18</u> |                       |                        |
| Set 1 (Random)        |                       |                        |
|                       | <u>Subset A (/s/)</u> | <u>Subset B (/kw/)</u> |
| Treated               | Save                  | Quack                  |
|                       | Sill                  | Quad                   |
|                       | Sit                   | Quail                  |
|                       | Saw                   | Quake                  |
|                       | Sam                   | Queen                  |
|                       | Seal                  | Quell                  |

|           |      |       |
|-----------|------|-------|
| Untreated | Sew  | Quick |
|           | Seed | Quit  |
|           | Sip  | Quill |
|           | Sigh | Quote |
|           | See  | Quip  |
|           | Sail | Quid  |
|           | Suit | Quay  |
|           | Say  | Quiz  |
|           | Sat  | Quite |

Set 2 (Blocked)

|           |                       |                        |
|-----------|-----------------------|------------------------|
|           | <u>Subset A (/ʃ/)</u> | <u>Subset B (/pl/)</u> |
| Treated   | Shack                 | Place                  |
|           | Shade                 | Plaque                 |
|           | Shine                 | Pledge                 |
|           | Ship                  | Plan                   |
|           | Shoe                  | Plate                  |
|           | Sham                  | Plane                  |
|           | Shoot                 | Play                   |
|           | Show                  | Plea                   |
|           | Shawl                 | Pluck                  |
|           | Shave                 | Pleat                  |
| Untreated | She                   | Plum                   |
|           | Shape                 | Plod                   |

|       |        |
|-------|--------|
| Shop  | Plow   |
| Sheep | Please |
| Shut  | Plug   |

Participant 19

Set 1 (Random)

|         | <u>Subset A (/dʒ/)</u> | <u>Subset B (/sm/)</u> |
|---------|------------------------|------------------------|
| Treated | Gem                    | Smack                  |
|         | Jail                   | Smile                  |
|         | Jet                    | Smash                  |
|         | Jane                   | Smoke                  |
|         | Jewel                  | Smooth                 |
|         | June                   | Smudge                 |
|         | Join                   | Smock                  |
|         | Jot                    | Smirk                  |
|         | Germ                   | Smidge                 |
|         | Gyp                    | Smote                  |

|           |      |       |
|-----------|------|-------|
| Untreated | John | Smart |
|           | Gym  | Smell |
|           | Job  | Small |
|           | Jade | Smut  |
|           | Jill | Smith |

Set 2 (Blocked)

|         | <u>Subset A (/θ/)</u> | <u>Subset B (/gl/)</u> |
|---------|-----------------------|------------------------|
| Treated | Thing                 | Glib                   |
|         | Thumb                 | Glass                  |
|         | Thought               | Gleam                  |
|         | Thighs                | Globe                  |
|         | Thatch                | Glen                   |
|         | Thaws                 | Glitch                 |
|         | Thebes                | Glop                   |
|         | Thin                  | Glove                  |
|         | Theme                 | Gloom                  |
|         | Thick                 | Glut                   |

|           |        |       |
|-----------|--------|-------|
| Untreated | Therm  | Glob  |
|           | Thong  | Glum  |
|           | Thane  | Gloat |
|           | Thorn  | Gloss |
|           | Thieve | Glam  |

## Participant 20

### Set 1 (Random)

|         | <u>Subset A (/θ/)</u> | <u>Subset B (/kr/)</u> |
|---------|-----------------------|------------------------|
| Treated | Anthological          | Anachronism            |
|         | Authoritarian         | Autocratical           |
|         | Catholicism           | Deconsecration         |
|         | Logarithmical         | Democratical           |

|           |                       |                        |
|-----------|-----------------------|------------------------|
|           | Monotheism            | Diacritical            |
|           | Ophthalmologist       | Discretionary          |
|           | Paleolithic           | Incredulity            |
|           | Photosynthesis        | Incrimination          |
|           | Psychotherapy         | Isochromatic           |
|           | Unsympathetic         | Mediocrity             |
| Untreated | Arithmetician         | Indiscriminate         |
|           | Athleticism           | Hypercriticize         |
|           | Elizabethan           | Microscopical          |
|           | Methodology           | Procrastination        |
|           | Orthographical        | Re crimination         |
|           | Set 2 (Blocked)       |                        |
|           | <u>Subset A (/ŋ/)</u> | <u>Subset B (/pl/)</u> |
| Treated   | Anglicization         | Amplification          |
|           | Bilingualism          | Diplomatical           |
|           | Conjunctivitis        | Disciplinarian         |
|           | Contradistinguish     | Exploratory            |
|           | Distinguishable       | Implementation         |
|           | Sanctification        | Inapplicable           |
|           | Tranquilization       | Inexplicable           |
|           | Unpityingly           | Irreplaceable          |
|           | Unrelentingly         | Multiplicity           |
|           | Unremittingly         | Reapplication          |

Untreated

Congregational

Inexplorable

Disentanglement

Reduplication

Extinguishable

Simplification

Unavailingly

Undiplomatic

Unconquerable

Unemployable
