# Supplementary material
Source: publisher figshare collection journal article supplement (https://asha.figshare.com/articles/dataset/_/5116831)

## Supplemental Material S5. Accuracy of production of target sounds in experiment words for various participants.

Accuracy of production of target sounds in experimental words for Participant 7.

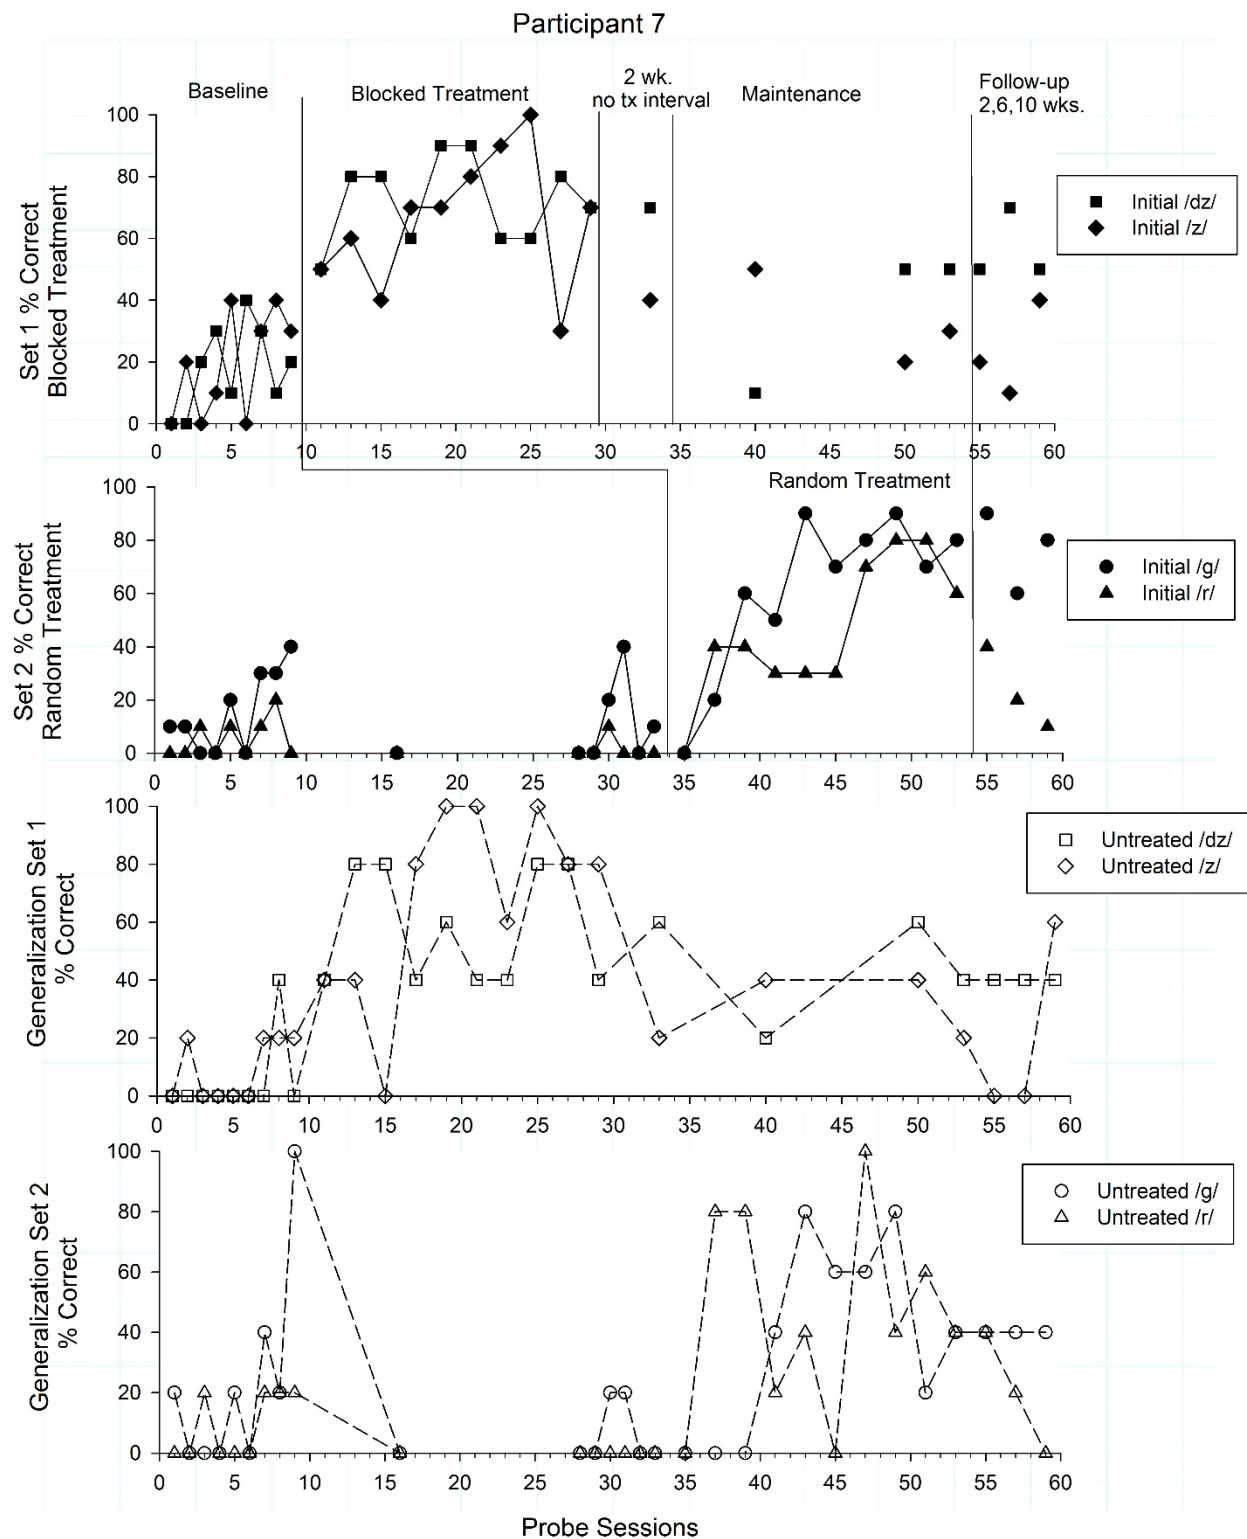

# Accuracy of production of target sounds in experimental words for Participant 8.

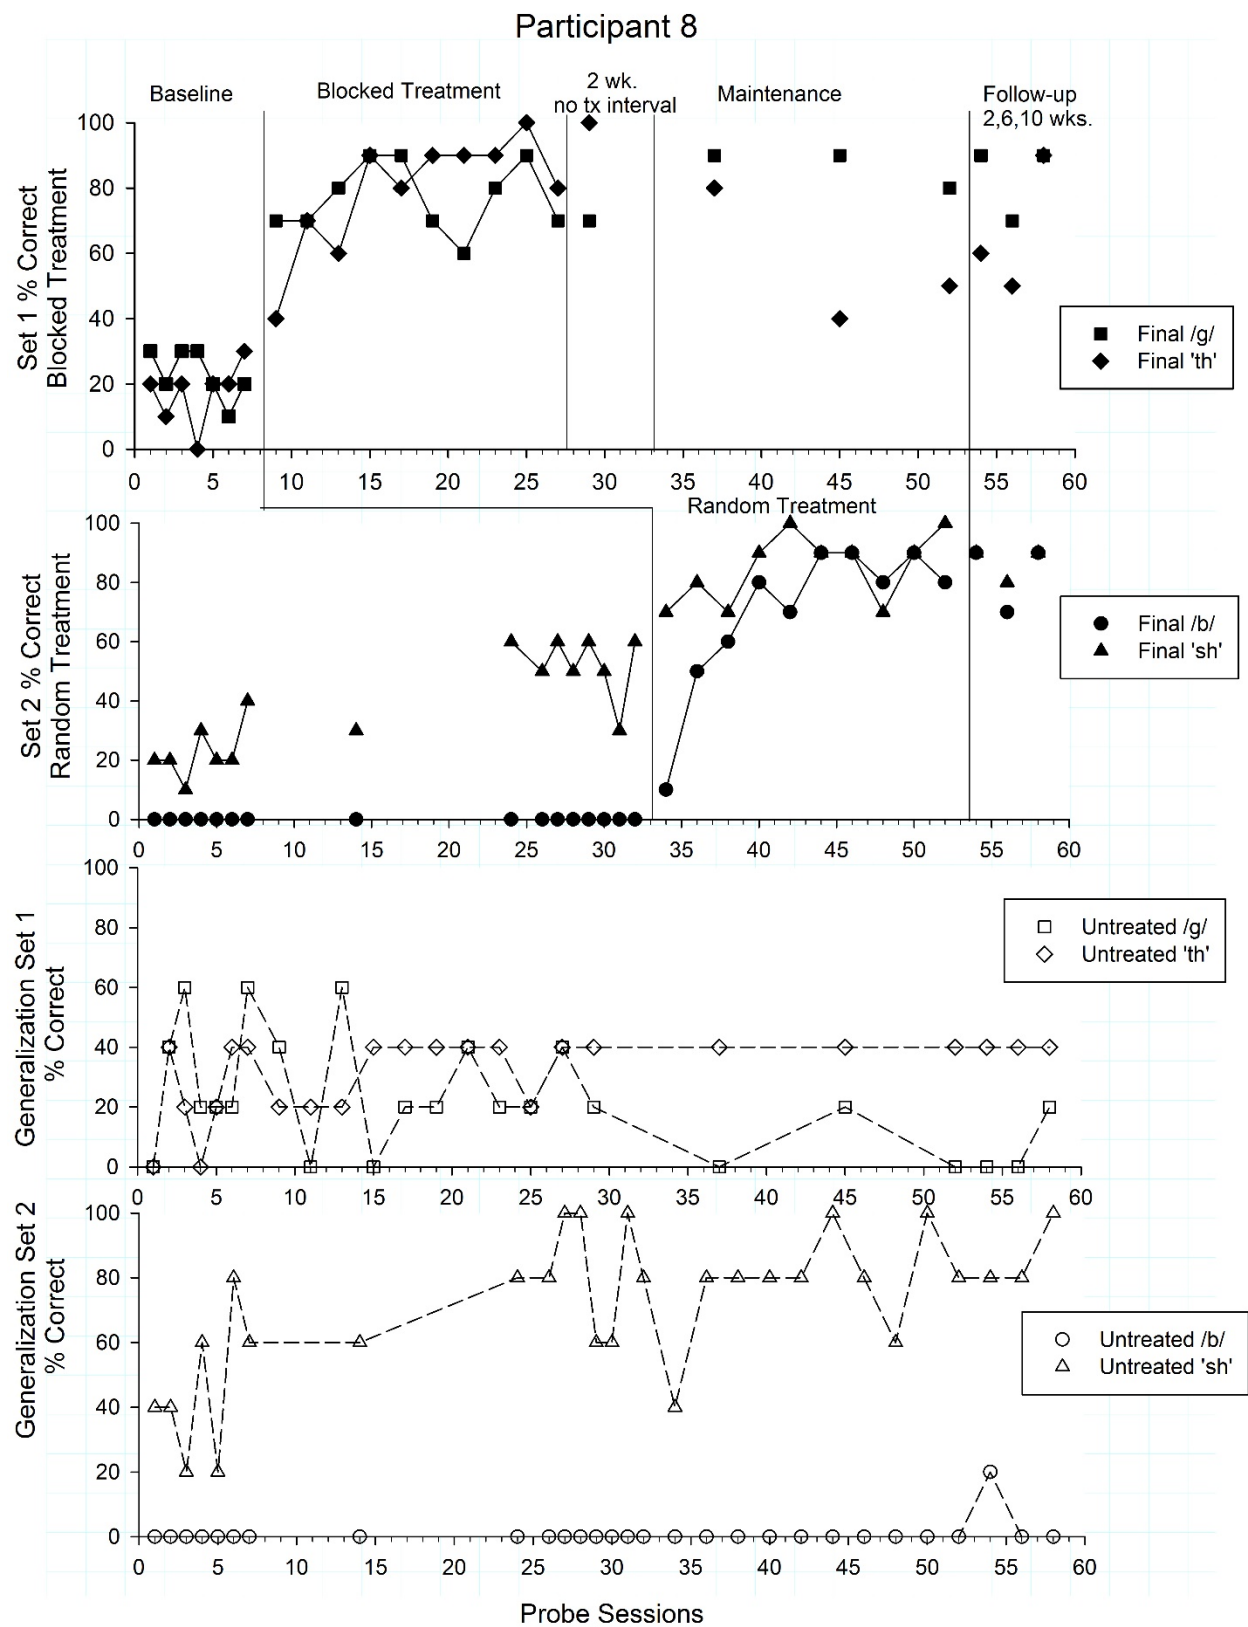

## Accuracy of production of target sounds in experimental words for Participant 9.

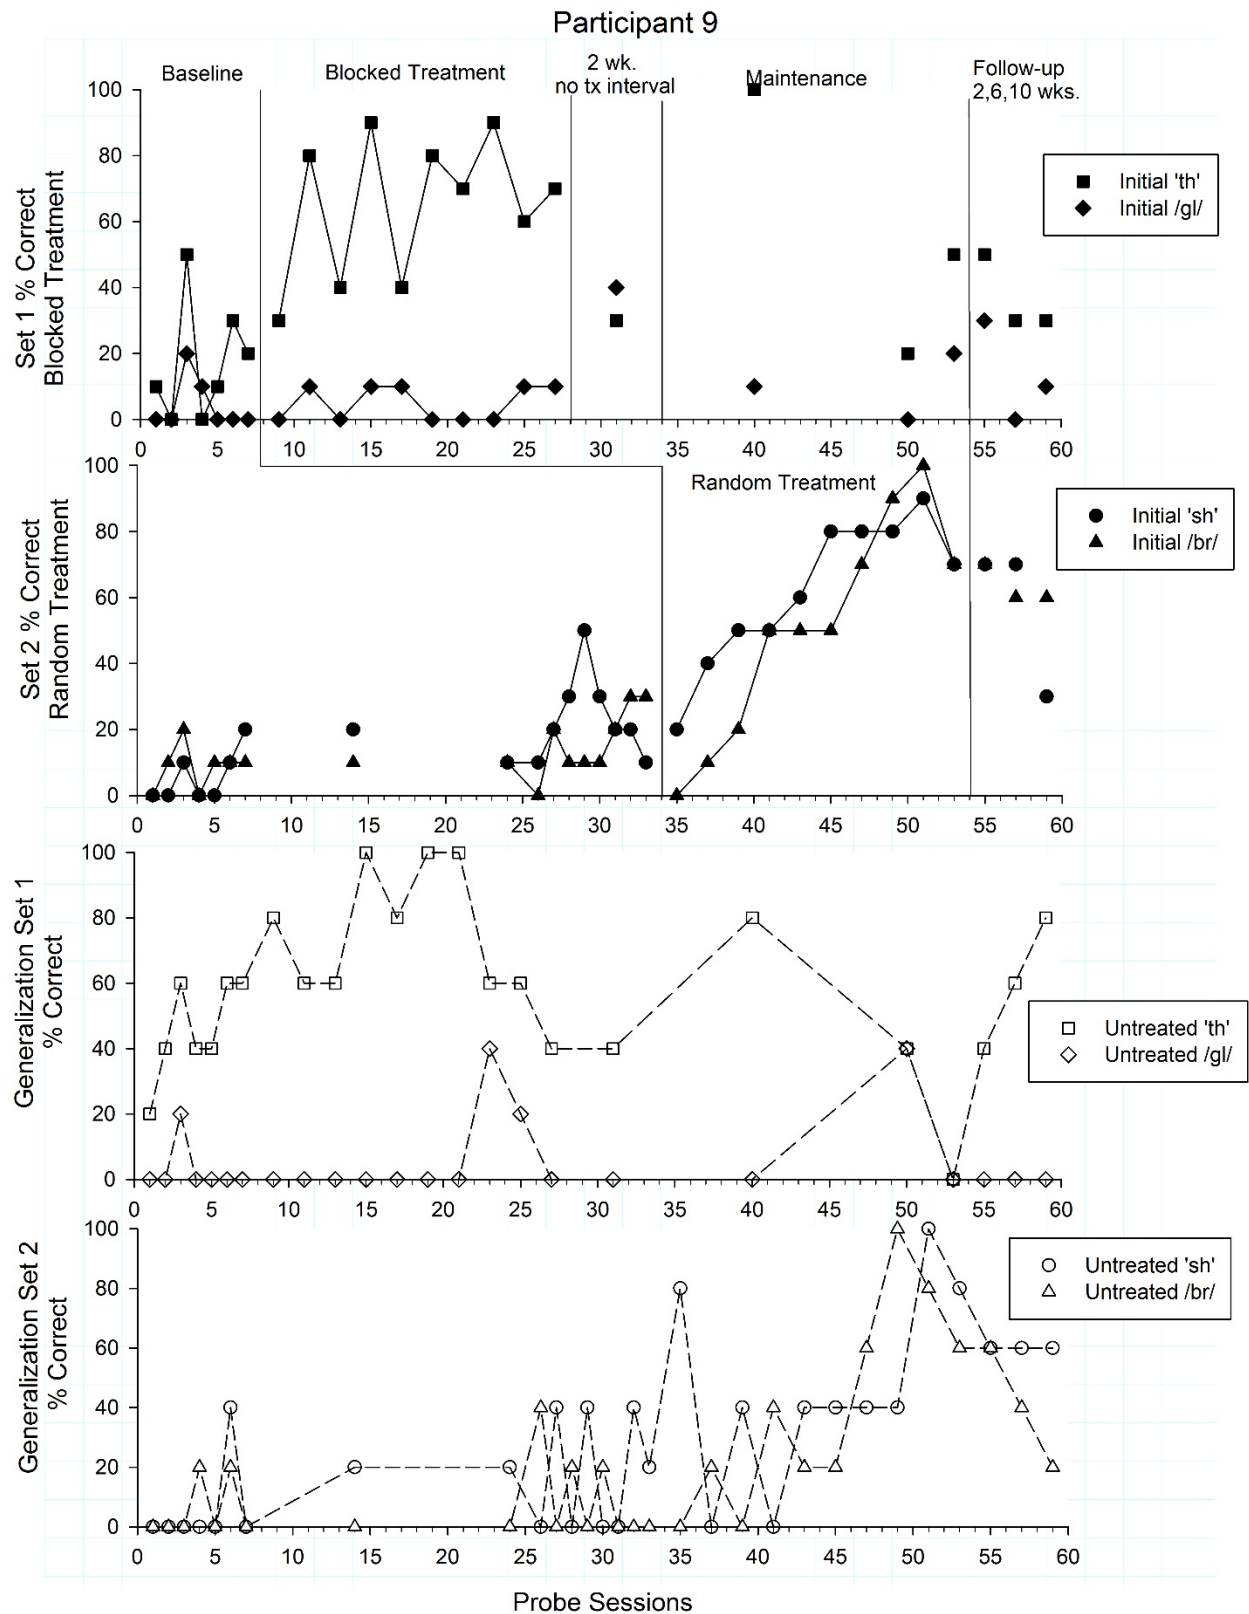

## Accuracy of production of target sounds in experimental words for Participant 10.

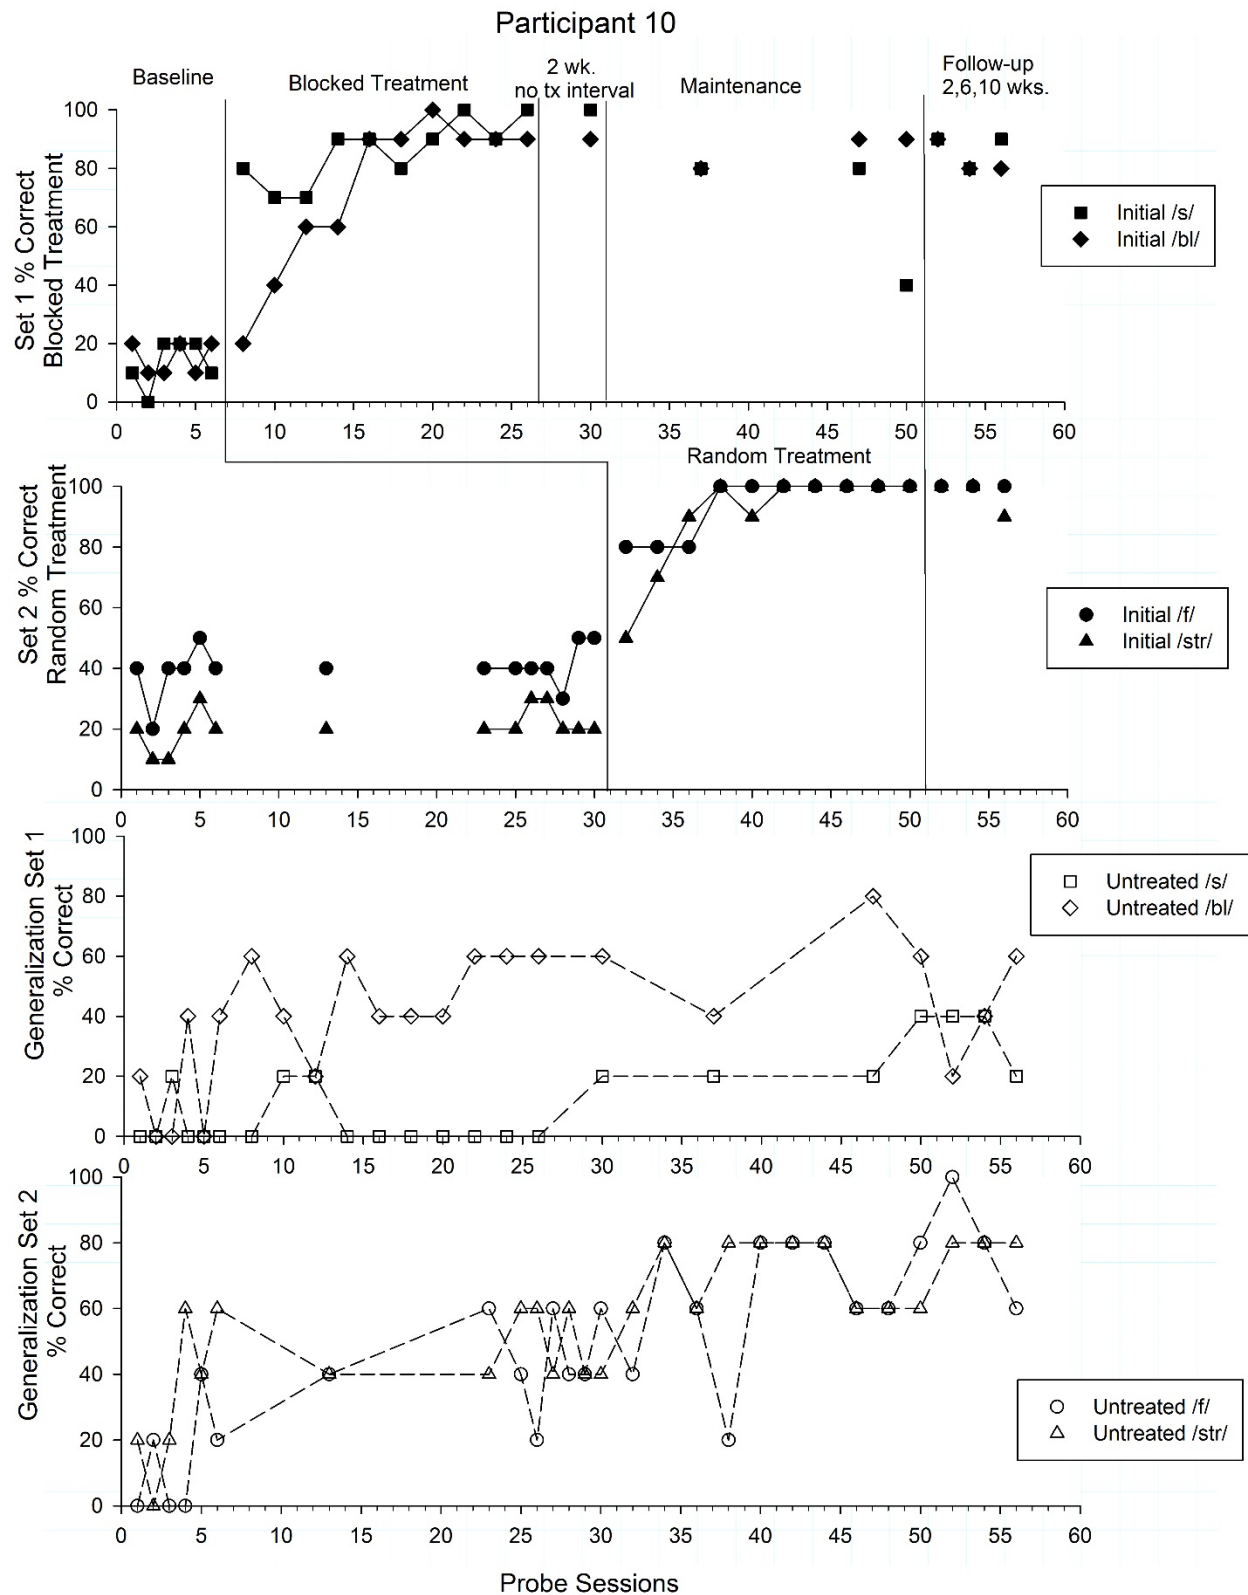

## Accuracy of production of target sounds in experimental words for Participant 11.

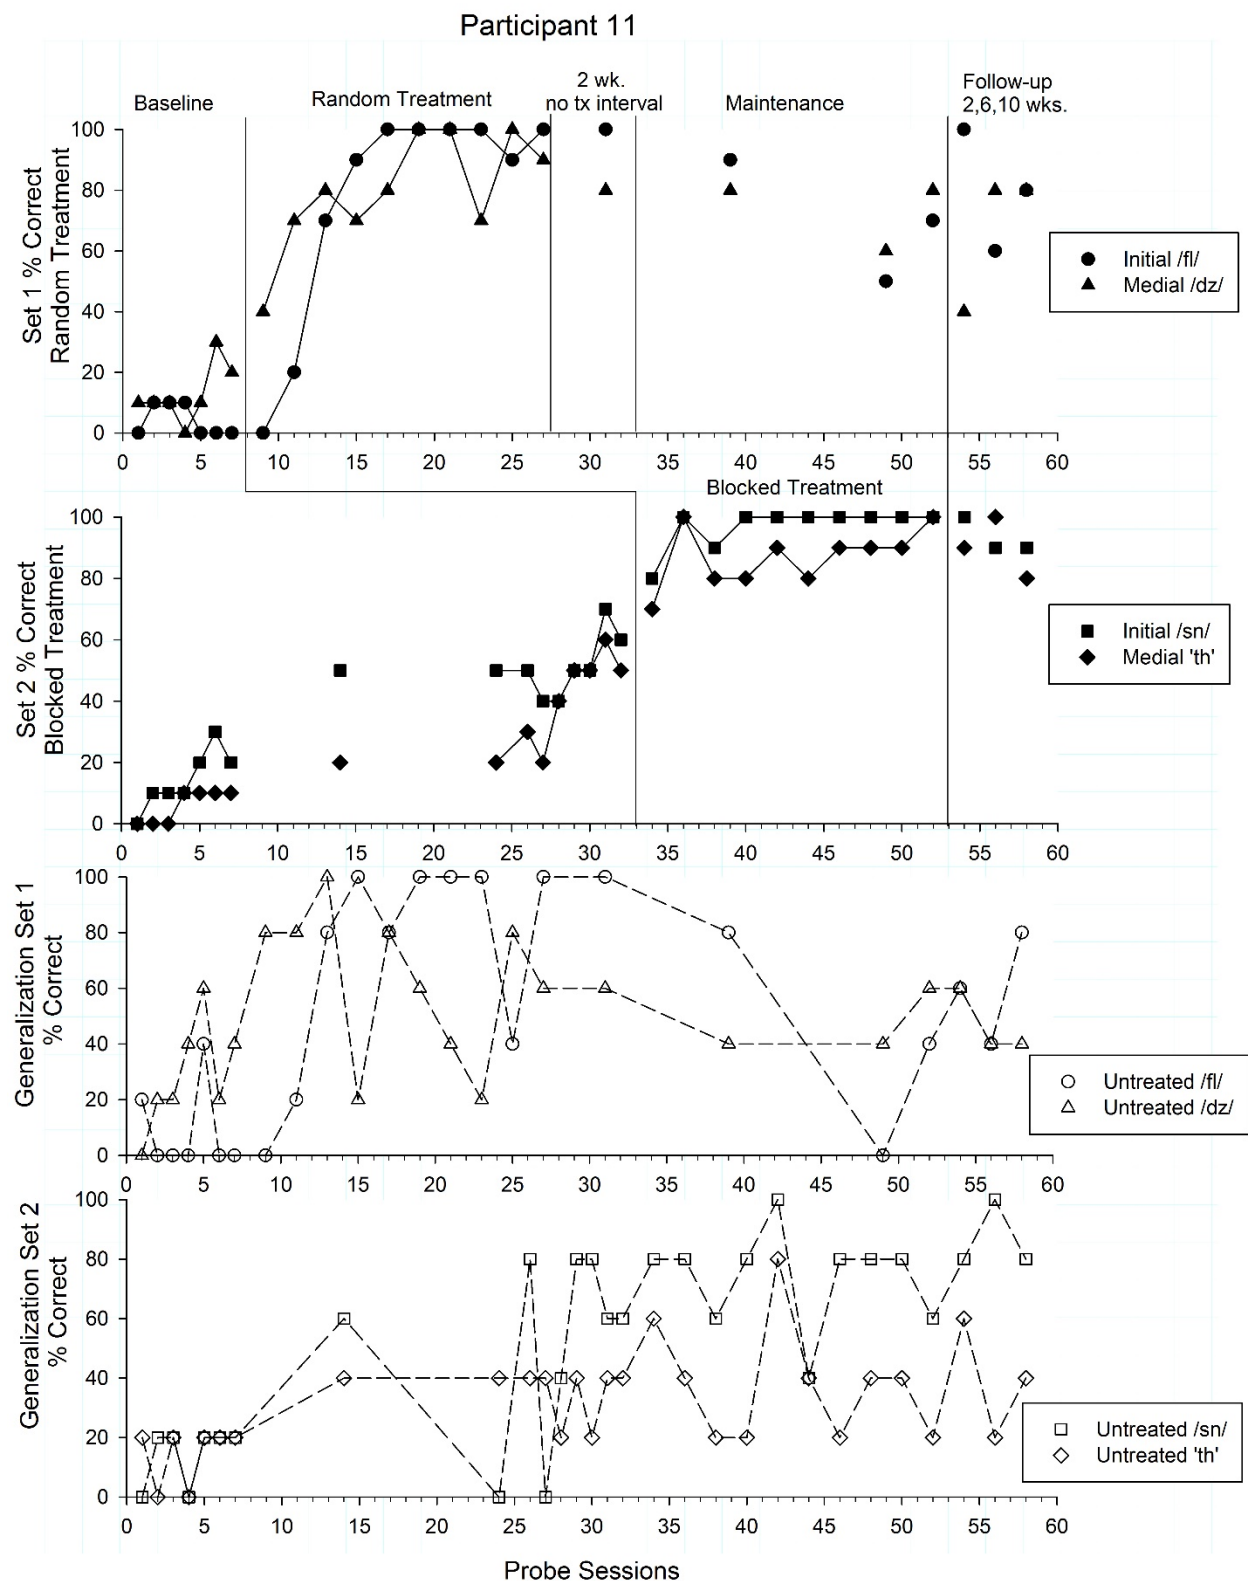



## Accuracy of production of target sounds in experimental words for Participant 12.

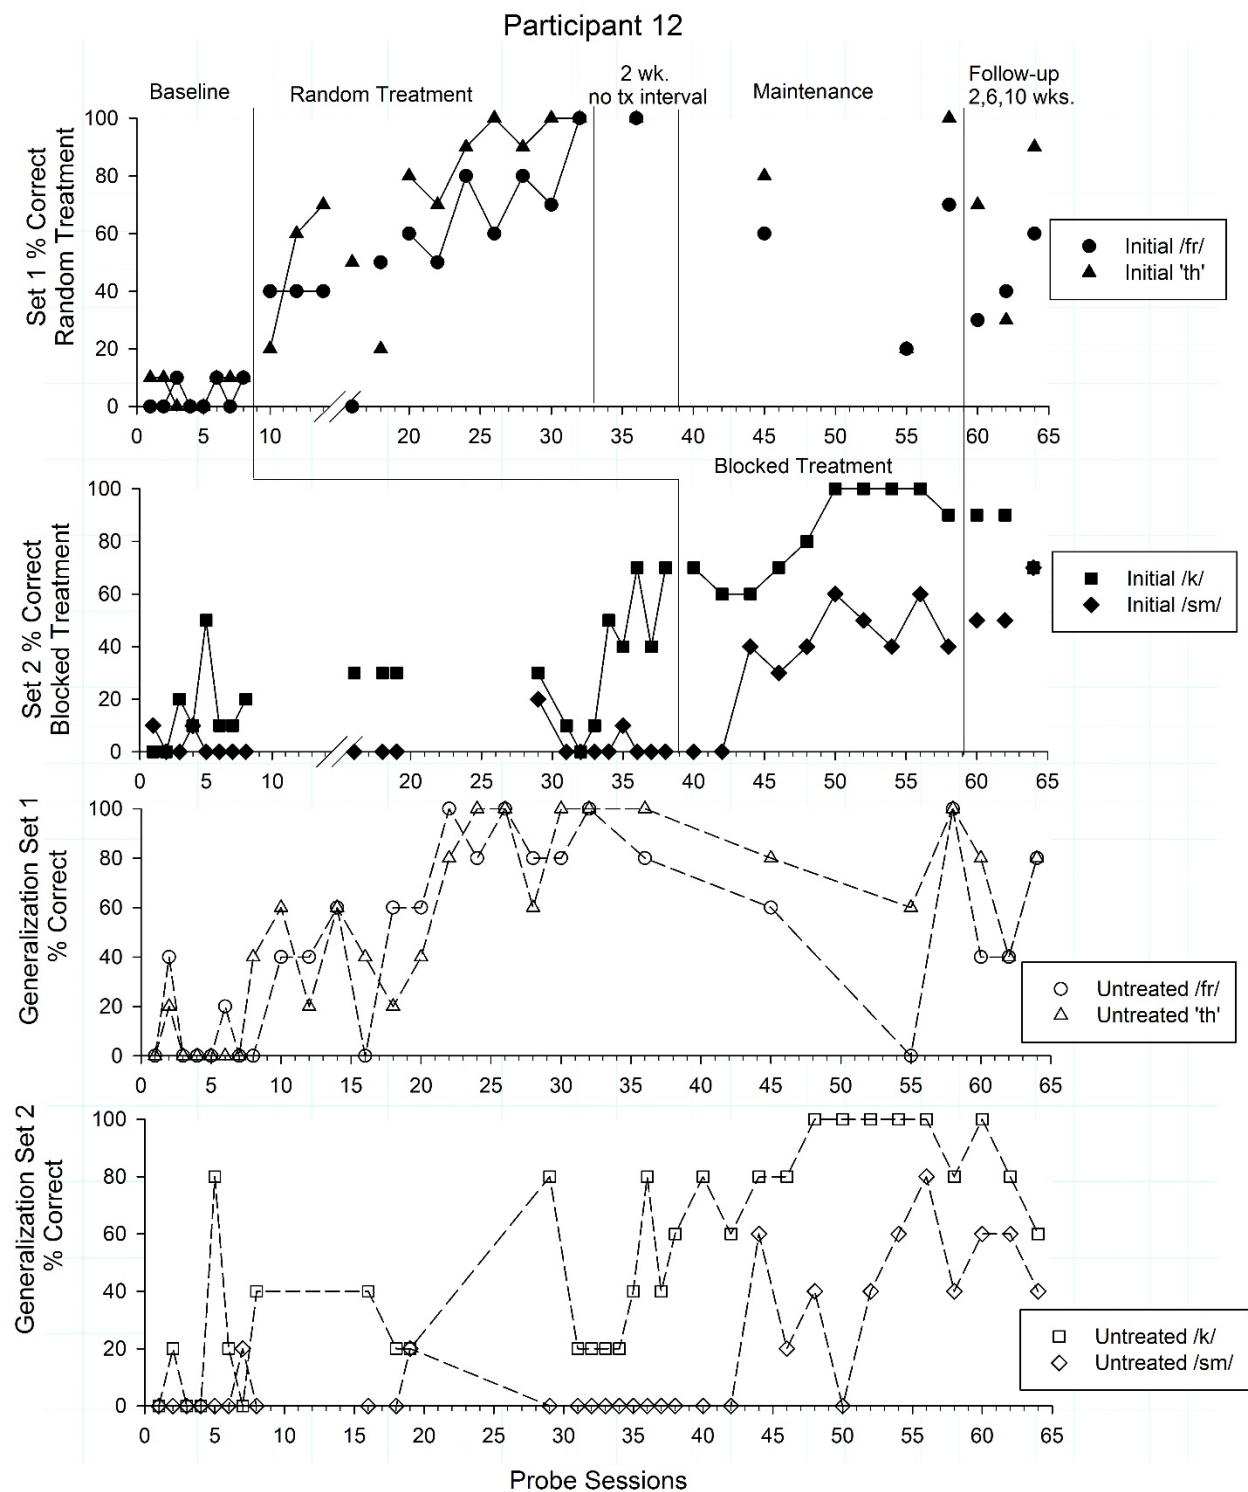

## Accuracy of production of target sounds in experimental words for Participant 14.

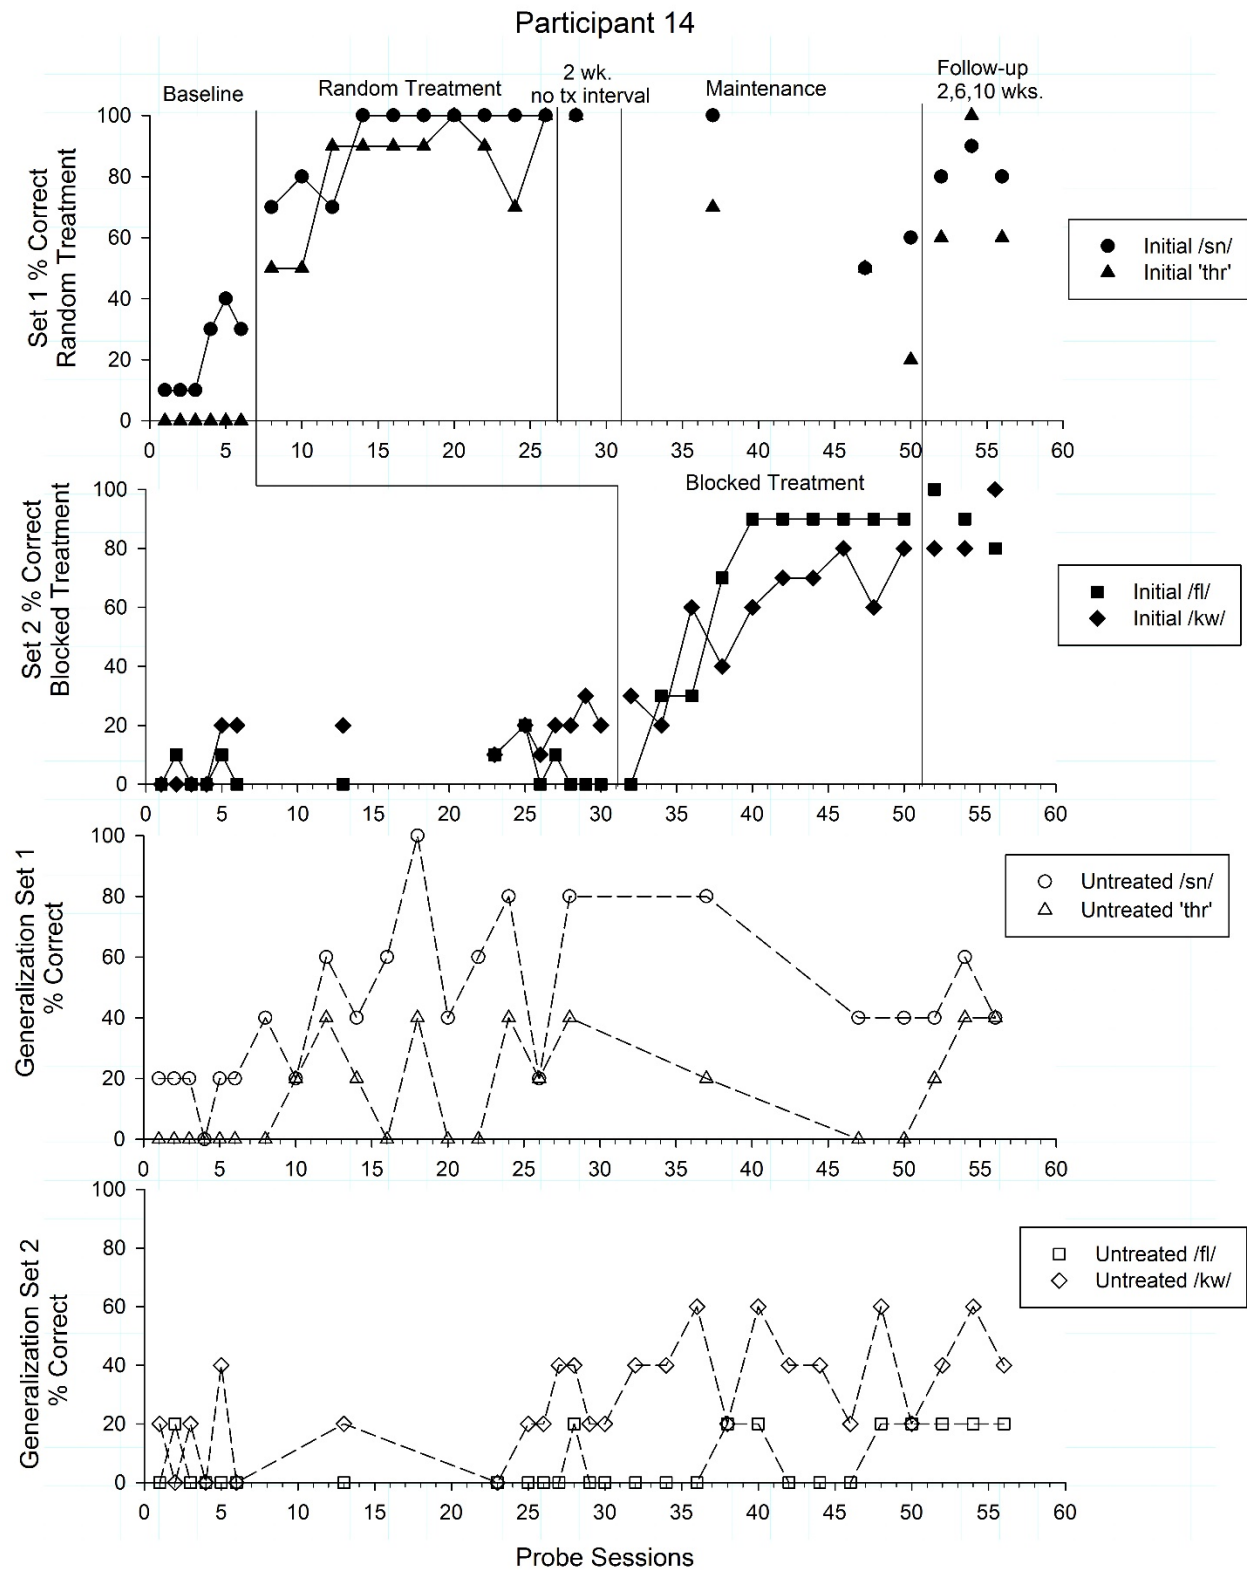

# Accuracy of production of target sounds in experimental words for Participant 17.

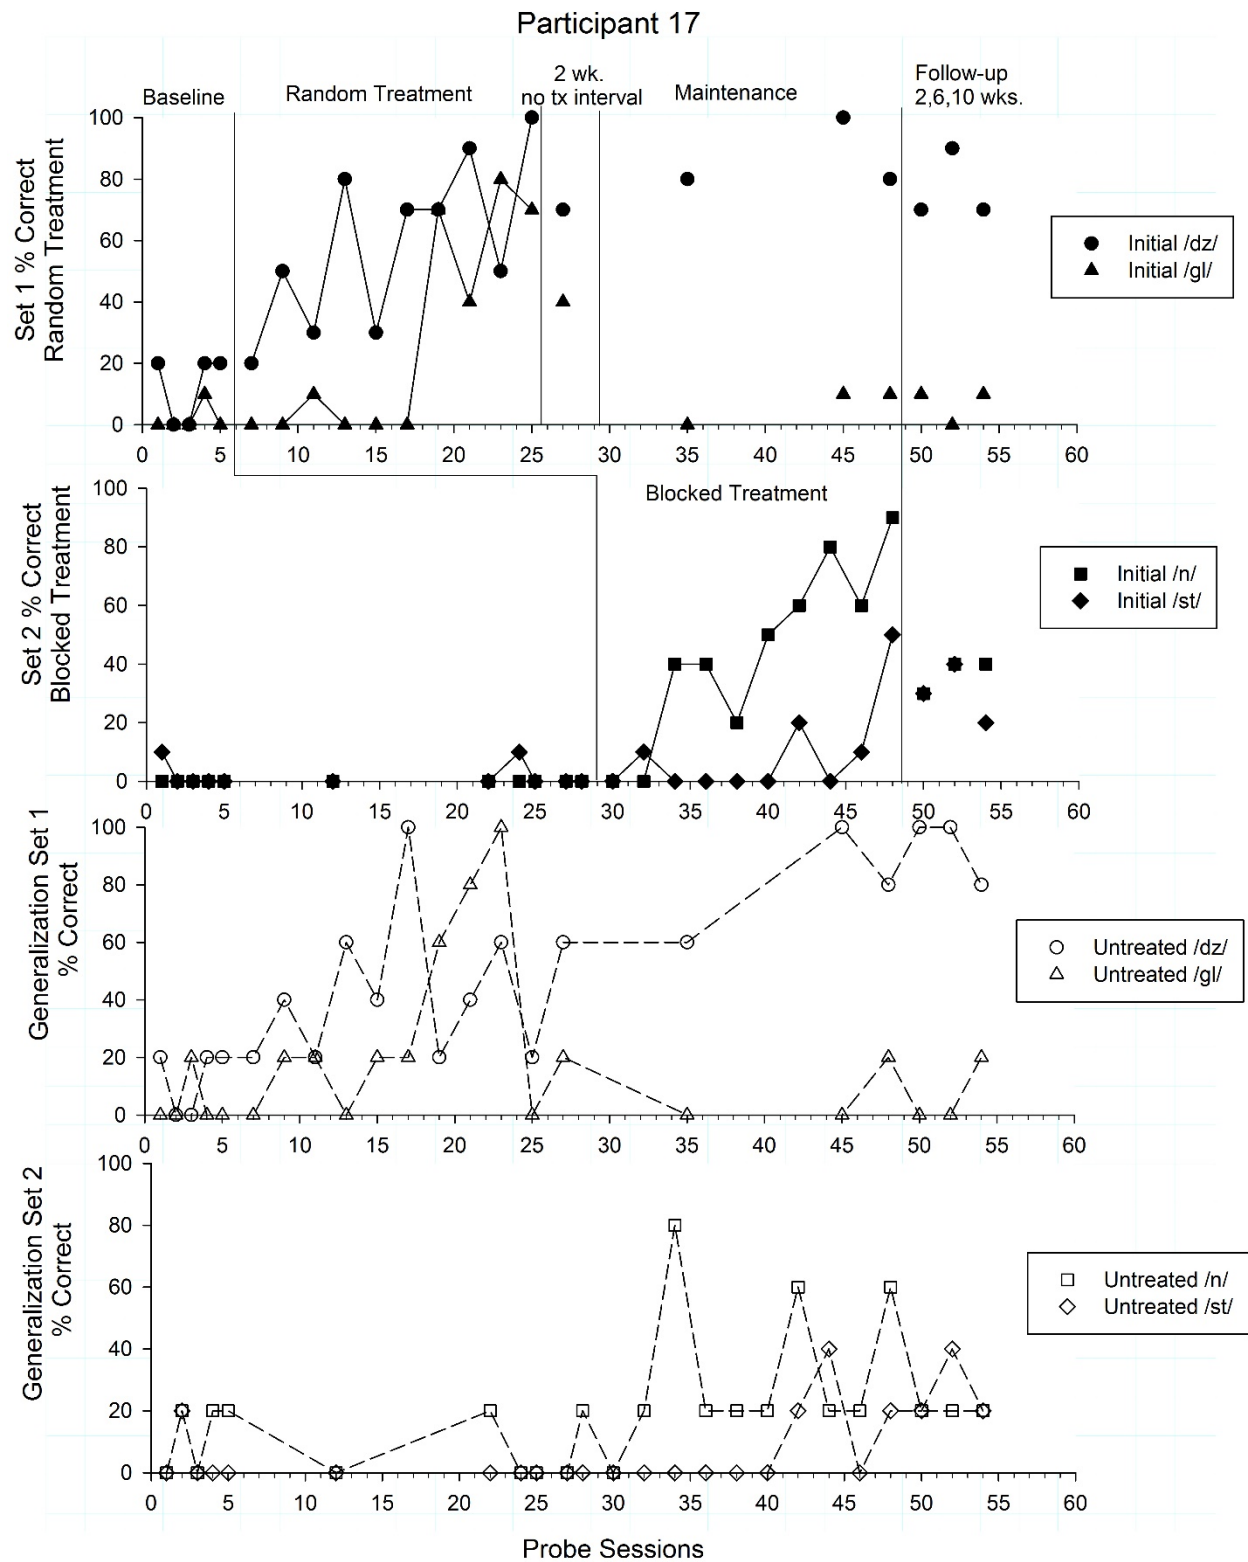



## Accuracy of production of target sounds in experimental words for Participant 18.

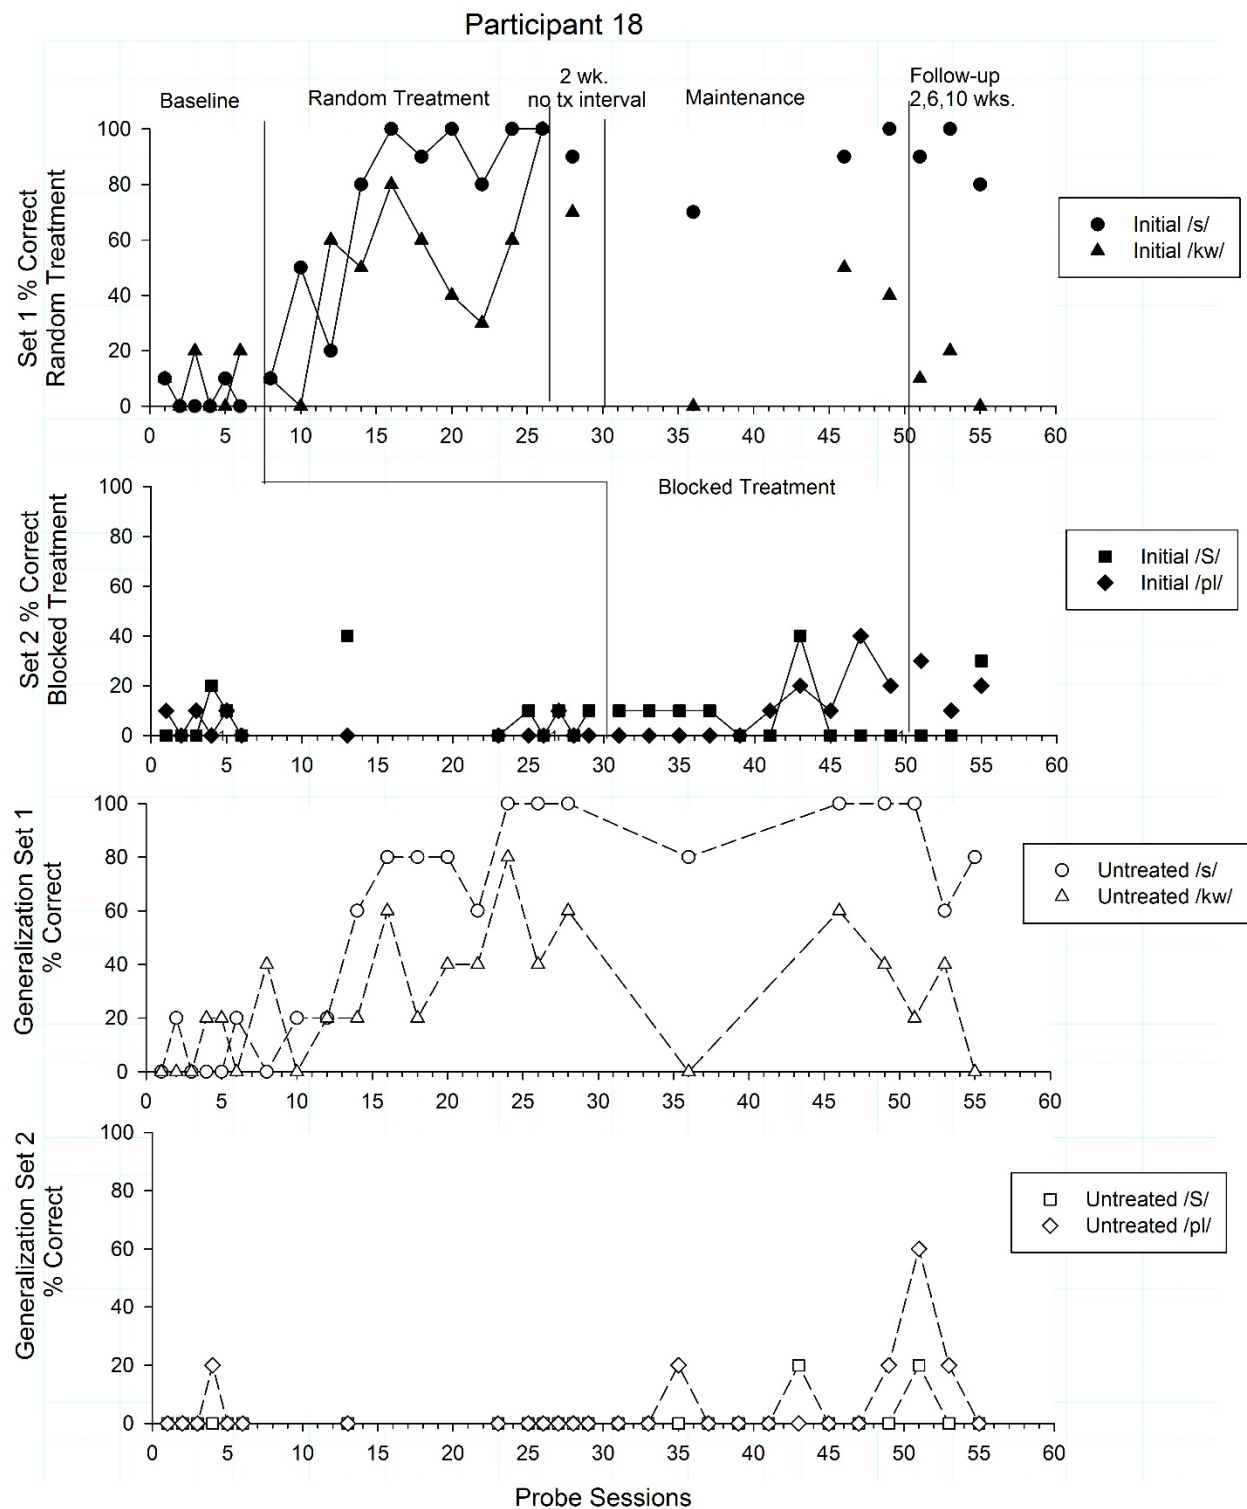

## Accuracy of production of target sounds in experimental words for Participant 20.

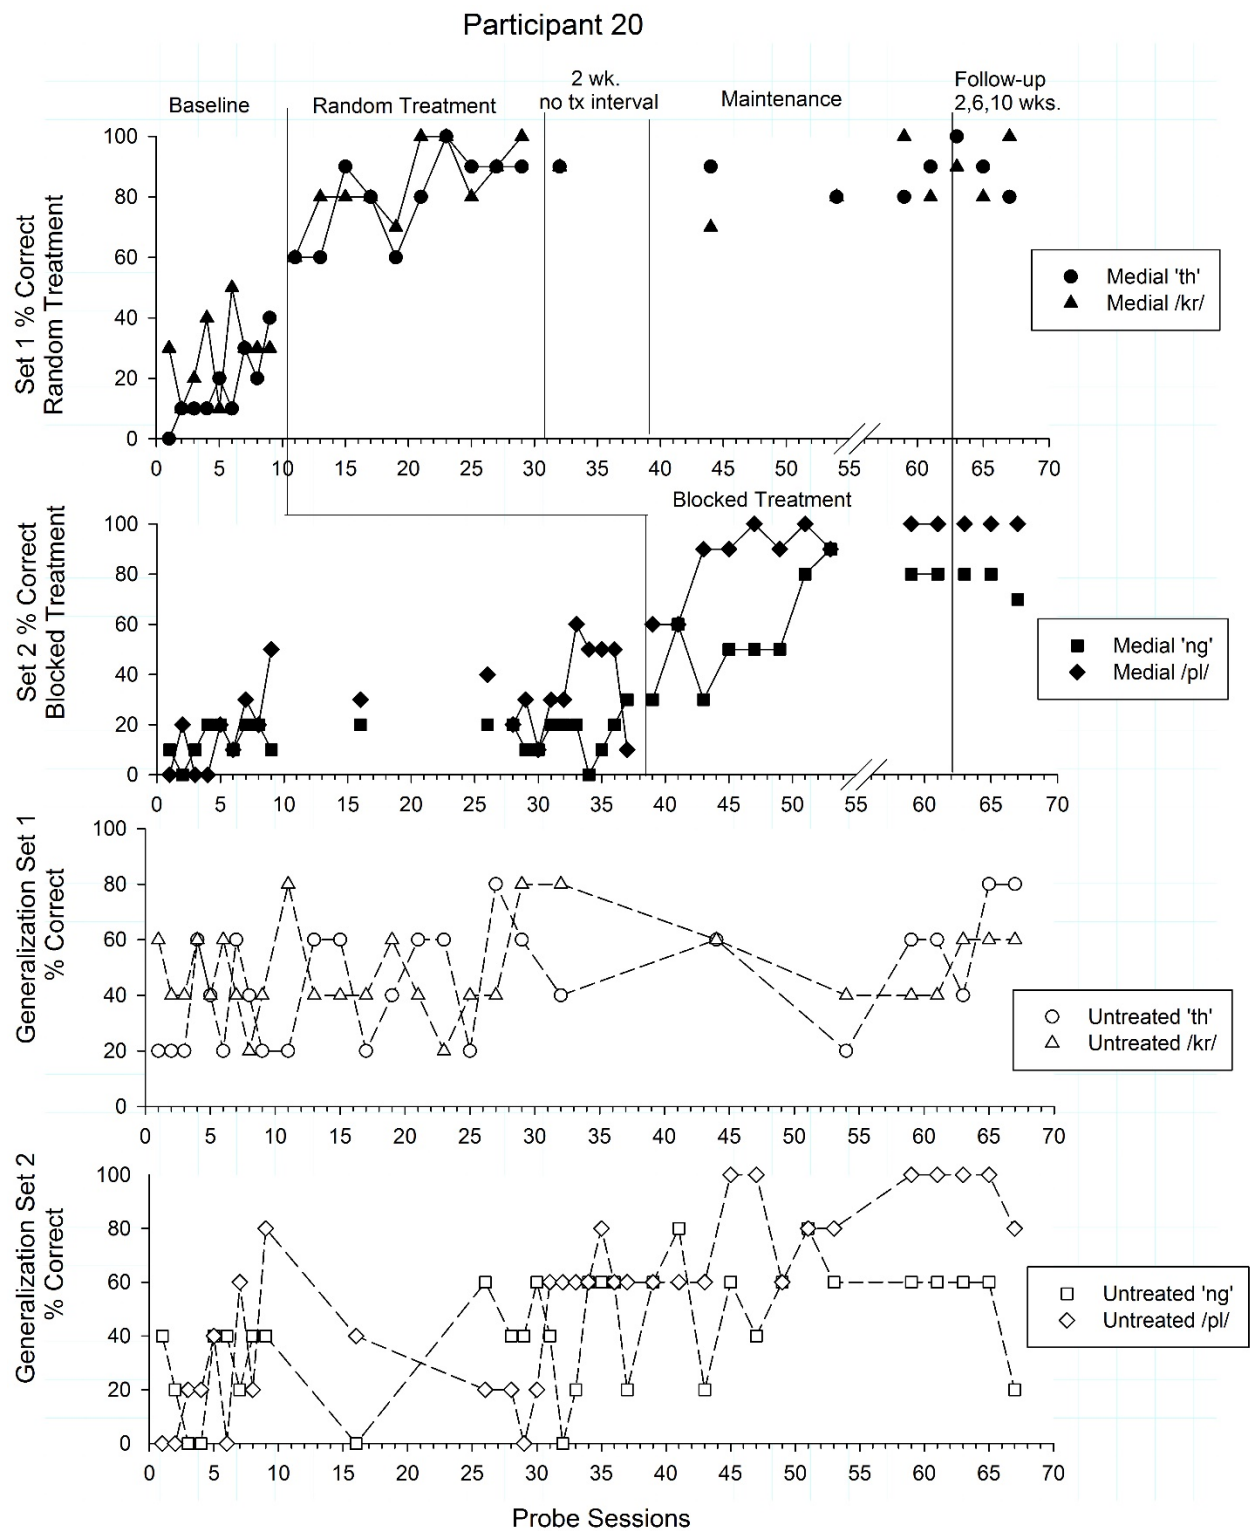

Supplement: Supplementary file 3 [file 1]
