# Supplementary material
Source: publisher figshare collection journal article supplement (https://asha.figshare.com/articles/dataset/_/5116831)
Supplement: Supplementary file 4 [file 1]

**Supplemental Material S2. Participant matching by group.**

| <b>Blocked 1<sup>st</sup> Treatment Group</b> |                     |               |                     | <b>Random 1<sup>st</sup> Treatment Group</b> |                     |               |                     |
|-----------------------------------------------|---------------------|---------------|---------------------|----------------------------------------------|---------------------|---------------|---------------------|
| <b>Participant</b>                            | <b>Aphasia Type</b> | <b>WAB AQ</b> | <b>AOS Severity</b> | <b>Participant</b>                           | <b>Aphasia Type</b> | <b>WAB AQ</b> | <b>AOS Severity</b> |
| P1                                            | Broca’s             | 68.9          | Moderate            | P11                                          | Broca’s             | 56.9          | Moderate            |
| P2                                            | Broca’s             | 28.7          | Severe              | P12                                          | Broca’s             | 32.7          | Severe              |
| P3                                            | Broca’s             | 56.4          | Moderate            | P13                                          | Broca’s             | 53.4          | Moderate-Severe     |
| P4                                            | Broca’s             | 48.2          | Moderate-Severe     | P14                                          | Broca’s             | 49.1          | Moderate-Severe     |
| P5                                            | Broca’s             | 60.9          | Mild-Moderate       | P15                                          | Broca’s             | 52.9          | Mild                |
| P6                                            | Broca’s             | 65.4          | Mild-Moderate       | P16                                          | Broca’s             | 59.9          | Mild-Moderate       |
| P7                                            | Global              | 11.5          | Severe              | P17                                          | Broca’s             | 24.2          | Moderate-Severe     |
| P8                                            | Broca’s             | 53.3          | Moderate-Severe     | P18                                          | Broca’s             | 59.8          | Moderate-Severe     |
| P9                                            | Broca’s             | 37.6          | Severe              | P19                                          | Broca’s             | 34.5          | Moderate-Severe     |
| P10                                           | Anomic              | 87.8          | Mild                | P20                                          | Anomic              | 86.6          | Mild                |
