# Supplementary material
Source: publisher figshare collection journal article supplement (https://asha.figshare.com/articles/dataset/_/5116831)
Supplement: Supplementary file 5 [file 1]

## **Supplemental Material S1.** Participant identifiers used in previous studies.

P1: AJSLP P#1

P2: AJSLP P#4

P3: AJSLP P#5

P4: AJSLP P#6

P13: AJSLP P#2

P19: AJSLP P#3

P5: IJSLP P#1

P6: IJSLP P#4

P15: IJSLP P#2

P16: IJSLP P#3

### Notes:

1. AJSLP: Wambaugh, J. L., Nessler, C., Wright, S., & Mauszycki, S. (2014). Sound Production Treatment: Effects of blocked and random practice. *American Journal of Speech-Language Pathology*, 23, S225–S245.
2. IJSLP: Wambaugh, J. L., Nessler, C., Wright, S., Mauszycki, S., & DeLong, C. (2016). Sound Production Treatment for acquired apraxia of speech: Effects of blocked and random practice on multisyllabic word production. *International Journal of Speech-Language Pathology*.
